# Supplementary material for: Investigation of ultrasound processing for homogenisation of blackberry dairy-based beverages
Source: Royal Society of Chemistry journal article supplement (doi:10.1039/d4fb00065j), 2024-01-01
Supplement: d4fb00065j1.pdf [file d4fb00065j1.pdf]

### Electronic Supplement Material (ESI)

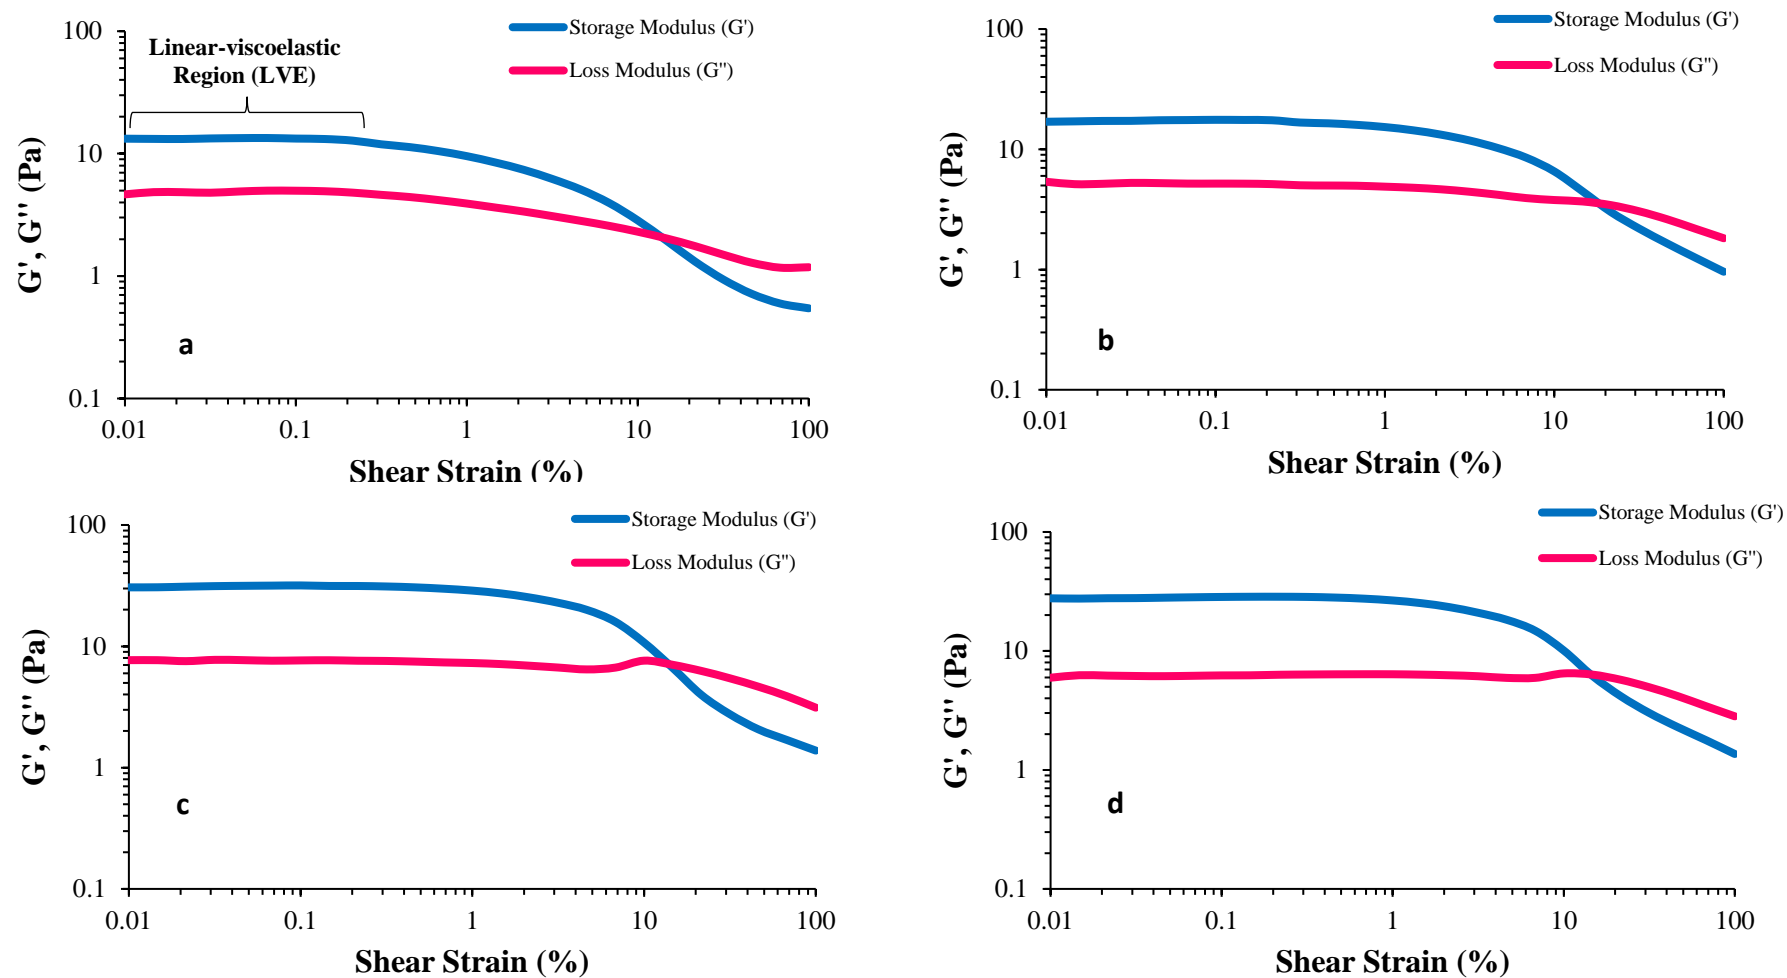

**Fig. S1** Viscoelastic curves of samples subjected to (a) conventional homogenization, (b) US for 1 min, (c) US for 3 min and (d) US for 5 min
